# Supplementary material for: Understanding the viral load during the synthesis and after rebinding of virus imprinted particles via real-time quantitative PCR
Source: Royal Society of Chemistry journal article supplement (doi:10.1039/c8an00300a), 2018-01-01
Supplement: c8an00300a1.pdf [file c8an00300a1.pdf]

## Supporting Information

for

### **Understanding the viral load during the synthesis and after rebinding of virus imprinted particles via real-time quantitative PCR**

M. Gast<sup>1</sup>, S. Kühner<sup>2</sup>, H. Sobek<sup>2</sup>, B. Mizaikoff<sup>1\*</sup>

<sup>1</sup> *Institute of Analytical and Bioanalytical Chemistry, Ulm University, Albert-Einstein-Allee 11, 89081 Ulm, Germany*

<sup>2</sup> *Labor Dr. Merk & Kollegen GmbH, Beim Braunland 1, 88414 Ochsenhausen*

#### **Corresponding Author**

\* E-mail: [boris.mizaikoff@uni-ulm.de](mailto:boris.mizaikoff@uni-ulm.de)

## Amplification of AdV in Correlation with the Input Amount

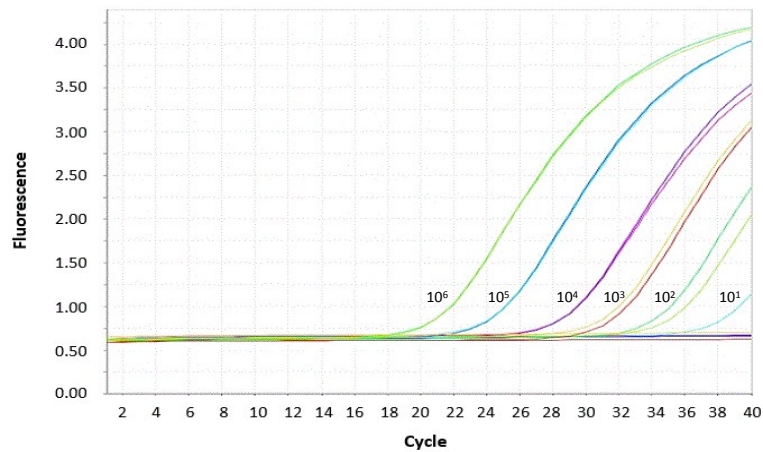

Figure S-1. Sensitivity of the AdV qPCR assay. Amplification curves of AdV obtained after DNA isolation. Only input levels within the linear range of the assay were included in the correlation analysis.

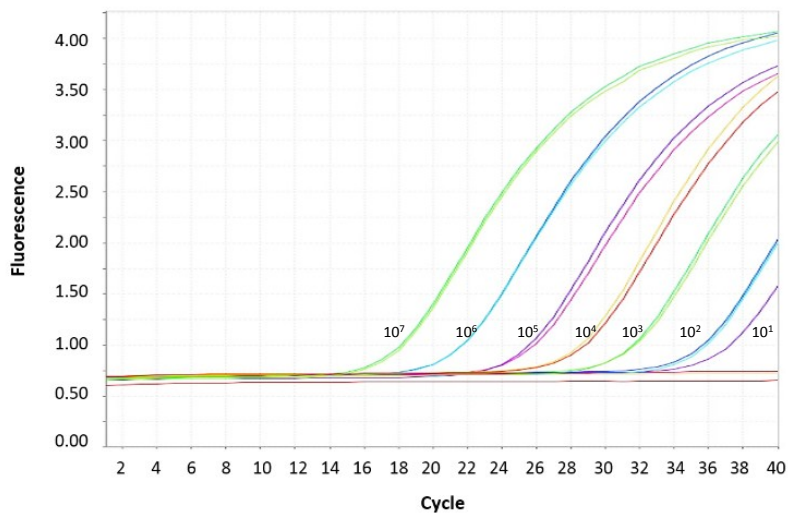

Figure S-2. Sensitivity of the AdV qPCR assay without DNA isolation. Amplification curves of AdV obtained using AdV samples directly without any DNA isolation step. Only input levels within linear the range of the assay were included in the correlation analysis.
